# Supplementary material for: Hedgehog signaling regulates gene expression in planarian glia
Source: eLife. 2016 Sep 9;5:e16996. doi: 10.7554/eLife.16996 (PMC5055395; doi:10.7554/eLife.16996)
Supplement: Figure 1—source data 1. — For each gene, log2 fold change between control(RNAi) and hh(RNAi) and between control(RNAi) and ptc(RNAi) cephalic ganglia samples are listed. References for previously published genes are listed (Cebrià and Newmark, 2005; Cebrià et al., 2002; Collins et al., 2010; Cowles et al., 2013; Currie and Pearson, 2013; Felix and Aboobaker, 2010; Fraguas et al., 2011; Gurley et al., 2008; Lapan and Reddien, 2011; März et al., 2013; Nishimura et al., 2010, 2008; Petersen and Reddien, 2008; Rink et al., 2009; Scimone et al., 2014a; Scimone et al., 2014b; Vásquez-Doorman and Petersen, 2014). DOI: http://dx.doi.org/10.7554/eLife.16996.003 [file elife-16996-fig1-data1.xlsx]

## Sheet: Sheet1
Figure 1 - source data 1. Neuronal markers used in RNA-seq analysis and co-expression studies
				control(RNAi) CNS vs. control(RNAi) head		hh(RNAi) CNS vs. control(RNAi) CNS		ptc(RNAi) CNS vs. control(RNAi) CNS
Contig ID	Annotation	Symbol	Reference	Log2 Fold Change	padj	Log2 Fold Change	padj	Log2 Fold Change	padj
dd_Smed_v4_11285_0_1	nou-darake	ndk	Cebria 2002	0.88314	0.000325576	0.159958	1	0.137132	1
dd_Smed_v4_14852_0_1	netrin 2	net2	Cebria 2005	2.51453	1.18e-21	0.246415	1	0.0606915	1
dd_Smed_v4_5133_0_1		1020HH-1	Collins 2010	6.2061	4.47e-297	-0.0763072	1	-0.222285	1
dd_Smed_v4_798_0_1		1020HH-2	Collins 2010	5.72019	8.68e-291	-0.172524	1	-0.233711	1
dd_Smed_v4_4046_0_1	cerebral peptide prohormone-1	cpp-1	Collins 2010	5.87817	1.61e-52	-0.341854	1	-0.21828	1
dd_Smed_v4_889_0_1		eye53-1	Collins 2010	4.60158	8.91e-218	0.0185559	1	-0.292984	1
dd_Smed_v4_4624_0_1		eye53-2	Collins 2010	5.36971	1.12e-247	-0.126324	1	-0.330815	1
dd_Smed_v4_8966_0_1	gonadotrophin releasing hormone like-1	grh-1	Collins 2010	6.70263	6.88e-255	-0.032968	1	-0.173269	1
dd_Smed_v4_13874_0_1	insulin-like peptide 1	ilp-1	Collins 2010	6.4178	9.99e-71	-0.297241	1	-0.271988	1
dd_Smed_v4_1015_0_1	neuropeptide precursor 2	npp-2	Collins 2010	4.64423	8.21e-224	0.100956	1	-0.171367	1
dd_Smed_v4_2270_0_1	neuropeptide precursor 3	npp-3	Collins 2010	5.77292	8.63e-290	-0.1159	1	-0.212559	1
dd_Smed_v4_4417_0_1	neuropeptide precursor 4	npp-4	Collins 2010	5.73628	1.65e-285	-0.0430925	1	-0.281926	1
dd_Smed_v4_1117_0_1	neuropeptide precursor 18	npp-18	Collins 2010	0.505851	0.0170341	-0.789184	1	0.321147	1
dd_Smed_v4_1483_0_1	neuropeptide precursor 22	npp-22	Collins 2010	4.74606	1.74e-227	-0.0678674	1	-0.1676	1
dd_Smed_v4_1566_0_1	prohormone convertase 2	pc2	Collins 2010	2.65499	5.13e-88	0.146016	1	-0.0321596	1
dd_Smed_v4_14095_0_1	pyrokinin prohormone like-1	ppl-1	Collins 2010	7.32492	1.21e-293	-0.356252	1	-0.29605	1
dd_Smed_v4_3211_0_1	pedal peptide prohormone like-1	ppp-1	Collins 2010	4.51197	9.46e-202	-0.0504001	1	-0.105901	1
dd_Smed_v4_10098_0_2	secreted peptide prohormone like-1	spp-2	Collins 2010	6.14611	1.68e-297	-0.197066	1	-0.351585	1
dd_Smed_v4_6003_0_1	secreted peptide prohormone like-14	spp-14	Collins 2010	5.11316	1.41e-211	-0.192335	1	-0.143423	1
dd_Smed_v4_9893_0_1	basic helix-loop-helix family, member coe	coe	Cowles 2013	2.35112	3.16e-47	0.115648	1	0.0139854	1
dd_Smed_v4_12722_0_1	basic helix-loop-helix family, member e22/23	e22/23	Cowles 2013	3.30231	7.39e-45	0.107896	1	-0.0604385	1
dd_Smed_v4_17731_0_1	basic helix-loop-helix family, member sim	sim	Cowles 2013	2.65143	3.62e-32	0.0174233	1	0.173315	1
dd_Smed_v4_11320_0_1	aromatic amino acid decarboxylase	aadc	Currie 2013	0.966312	0.000131396	0.23508	1	0.0402578	1
dd_Smed_v4_11521_0_1	lim homeobox transcription factor 1/5	lhx1/5-1	Currie 2013	1.3113	0.001088	0.092974	1	0.165771	1
dd_Smed_v4_15253_0_1	paired-like homeodomain	pitx	Currie 2013	1.99715	4.75e-14	0.172932	1	0.0281038	1
dd_Smed_v4_8392_0_1	tryptophan hydroxylase	tph	Currie 2013	0.547681	0.291069	-0.0507845	1	-0.299724	1
dd_Smed_v4_8606_0_1	prep homeodomain-like	prep	Felix 2010	-1.10639	4.48e-11	0.187997	1	0.241072	1
dd_Smed_v4_42610_0_1	tyramine beta-hydroxylase	tbh	Fraguas 2011	6.66996	1.81e-160	-0.299038	1	-0.0809062	1
dd_Smed_v4_16581_0_1	tyrosine hydroxylase	th	Fraguas 2011	2.91815	2.95e-49	0.0653573	1	0.00499618	1
dd_Smed_v4_8832_0_1	secreted frizzled-related protein 2	sFRP-2	Gurley 2008	-0.78925	2.3e-05	0.0460165	1	-0.169623	1
dd_Smed_v4_23249_0_1	forkhead box transcription factor d	foxD	Scimone 2014b	2.91731	5.6e-09	-0.145739	1	0.021456	1
dd_Smed_v4_34399_0_1	tyrosinase	tyr	Lapan 2011	-2.42904	1.97e-07	0.172909	1	-0.308342	1
dd_Smed_v4_10192_0_1	vesicular glutamate transporter	VGluT	Marz 2013	1.40907	6.65e-19	0.127217	1	0.0803263	1
dd_Smed_v4_12653_0_1	glutamate decarboxylase	gd	Nishimura 2008	3.45275	7.27e-52	-0.447143	1	-0.0728465	1
dd_Smed_v4_13487_0_1	wnt2	wnt2	Petersen 2008	-2.06856	5.47e-17	-0.288793	1	-0.530765	1
dd_Smed_v4_6604_0_1	nou-darake-like 3	ndl-3	Rink 2009	-0.148036	0.574935	0.232362	1	0.0611514	1
dd_Smed_v4_12674_0_1	nou-darake-like 4	ndl-4	Rink 2009	-0.660372	0.0523492	-0.0858216	1	0.485702	1
dd_Smed_v4_6208_0_1	choline acetyltransferase	chat	Nishimura 2010	2.8154	6.1e-95	0.271316	1	-0.190489	1
dd_Smed_v4_15531_0_1	zinc finger protein 1	zic-1	Vasquez-Doorman 2014	-1.85734	4.41e-10	-0.333071	1	0.635858	1
dd_Smed_v4_856_0_1	castor	cas	Scimone 2014a	-0.112136	0.627026	-0.174044	1	0.359854	1
dd_Smed_v4_14611_0_1	ets domain transcription factor 1	elf-1	Scimone 2014a	2.15978	3.51e-27	0.215653	1	-0.0414592	1
dd_Smed_v4_16297_0_1	forkhead box transcription factor q2	FoxQ2	Scimone 2014a	-0.347666	0.744304	0.335608	1	0.425813	1
dd_Smed_v4_75162_0_1	glass-like	glass	Scimone 2014a	4.81233	1.57e-12	0.0584335	1	0.373213	1
dd_Smed_v4_15144_0_1	lim homeobox transcription factor 2/9	lhx2/9	Scimone 2014a	1.68517	3.07e-09	0.282203	1	0.325625	1
dd_Smed_v4_13898_0_1	nk2 homeobox transcription factor 2	nkx2	Scimone 2014a	1.3894	3.9e-11	-0.12548	1	0.174135	1
dd_Smed_v4_11198_0_1	nk2 homeobox transcription factor 6	nkx6	Scimone 2014a	0.155119	0.655392	0.247347	1	0.106267	1
dd_Smed_v4_15178_0_1	six homeobox transcription factor 3	six3	Scimone 2014a	1.46016	7.98e-08	-0.0287971	1	0.138951	1
dd_Smed_v4_13215_0_1	sry-box transcription factor b	soxB	Scimone 2014a	1.35649	1.21e-09	0.310324	1	-0.0715208	1
dd_Smed_v4_25321_0_1	sry-box transcription factor b2	soxB-2	Scimone 2014a	3.18974	3.1e-14	-0.176278	1	-0.055879	1
dd_Smed_v4_13056_0_1	tcf/lef transcription factor 1	Tcf/Lef-1	Scimone 2014a	3.14534	1.71e-94	0.108051	1	-0.139804	1
dd_Smed_v4_14633_0_1	orthodenticle homolog a	otxA	Scimone 2014a	1.22249	2.47e-10	0.103905	1	0.175506	1
dd_Smed_v4_15516_0_1	orthodenticle homolog b	otxB	Scimone 2014a	3.23054	6.79e-53	0.0710327	1	-0.100403	1
dd_Smed_v4_17726_0_1	paired box transcription factor 6a	pax6A	Scimone 2014a	3.22011	8.53e-73	0.137878	1	0.00993168	1
dd_Smed_v4_35892_0_1	paired box transcription factor 6b	pax6B	Scimone 2014a	0.758365	0.160877	0.42015	1	0.124336	1
dd_Smed_v4_21801_0_1	paired box transcription factor 3/7	pax3/7	Scimone 2014a	2.70029	1.73e-23	0.0321609	1	0.150614	1
dd_Smed_v4_7133_0_2	microtubule-associated protein tau	tau		2.14514	7.88e-37	-0.117248	1	-0.19592	1
dd_Smed_v4_12112_0_1	G protein alpha subunit	Galpha		1.59284	8.99e-22	0.235509	1	-0.0333748	1
dd_Smed_v4_21108_0_1	aromatic L-amino acid decarboxylase	aladc		1.72459	4.18e-07	-0.0744354	1	0.0638105	1
dd_Smed_v4_14730_0_1	voltage-dependent T-type calcium channel subunit alpha	Ca channel		2.33609	1.1e-12	0.175448	1	-0.207517	1
dd_Smed_v4_12978_0_4	potassium voltage-gated channel, subfamily H	K channel		2.60055	3.46e-27	0.0671904	1	-0.262122	1
dd_Smed_v4_12243_0_1	sodium voltage-gated channel type 4	Na channel		1.94782	4.5e-25	0.0426208	1	-0.00506072	1
dd_Smed_v4_7917_0_1	sodium/potassium-transporting ATPase	Na/K ATPase		1.1179	0.081301	0.0830024	1	0.237598	1
dd_Smed_v4_11630_0_1	vesicular acetylcholine transporter	VAchT		2.07317	6.66e-09	0.233679	1	0.0522278	1
dd_Smed_v4_3135_0_1	synapsin	syn		1.41034	1.67e-25	0.146428	1	-0.0109017	1
dd_Smed_v4_3977_0_1	synaptosomal-associated protein 25	SNAP25		1.83487	4.05e-36	0.238587	1	0.0945879	1
dd_Smed_v4_6478_0_1	synaptogyrin	syngr		2.62612	2.92e-29	0.0597446	1	0.0497064	1
dd_Smed_v4_4222_0_1	synaptotagmin 1	syt1-1		3.45596	2.26e-54	0.0436495	1	0.0490058	1
dd_Smed_v4_6730_0_1	synaptotagmin 1	syt1-2		3.18269	9.71e-63	-0.0402245	1	-0.0404586	1
dd_Smed_v4_7243_0_1	synaptotagmin 11	syt11		3.23728	5.49e-116	0.0982148	1	-0.00343579	1
dd_Smed_v4_11981_0_1	unc-13	unc-13		1.45309	2.25e-18	0.190637	1	-0.0734184	1
