# Supplementary material for: Hedgehog signaling regulates gene expression in planarian glia
Source: eLife. 2016 Sep 9;5:e16996. doi: 10.7554/eLife.16996 (PMC5055395; doi:10.7554/eLife.16996)
Supplement: Figure 1—source data 2. — For each gene, general expression pattern and log2 fold enrichment of CNS tissue expression over head fragment expression is listed. CNS, central nervous system; GUT, intestinal tract; MUS, muscle layer; NB, neoblasts; NP, neuropil; NPH, nephridia; PCYM, parenchyma; PHX, pharynx; PR, photoreceptors; RIM, body peripheral edge. References for previously published genes are listed (Cebrià and Newmark, 2005; Collins et al., 2010; Currie and Pearson, 2013; Eisenhoffer et al., 2008; Fraguas et al., 2011; Lapan and Reddien, 2011, 2012; Petersen and Reddien, 2009; Reddien et al., 2005b; Rink et al., 2009; Scimone et al., 2011; Witchley et al., 2013; Zayas et al., 2010). DOI: http://dx.doi.org/10.7554/eLife.16996.004 [file elife-16996-fig1-data2.xlsx]

## Sheet: Sheet1
Figure 1 - source data 2. Enrichment of neuronal markers and depletion of non-neuronal markers in cephalic ganglia tissue libraries
				control(RNAi) CNS vs. control(RNAi) head
Contig ID	Annotation	Expression	References	Log2 Fold Change	padj
dd_Smed_v4_78_0_1	gapdh	Global		-0.10742	0.540252
dd_Smed_v4_41965_0_1	hedgehog	CNS	Rink 2009	5.85132	5.65162e-57
dd_Smed_v4_7063_0_2	patched	CNS, PHX, PCYM	Rink 2009	-0.416302	0.0389597
dd_Smed_v4_9474_0_1	smoothened	CNS, PHX, PCYM	Rink 2009	0.865295	3.84461e-07
dd_Smed_v4_10354_0_1	sufu	PHX, PCYM	Rink 2009	0.410265	0.104356
dd_Smed_v4_7470_0_1	gli-1	GUT, MRG	Rink 2009	-2.09884	3.29696e-29
dd_Smed_v4_46372_0_1	gli-2		Rink 2009	n/a	0.22823
dd_Smed_v4_17566_0_1	gli-3		Rink 2009	0.402287	0.383946
dd_Smed_v4_3135_0_1	synapsin	CNS, PNS		1.41034	1.67274e-25
dd_Smed_v4_6208_0_1	choline acetyltransferase	CNS, PNS	Nishimura 2010	2.8154	6.10459e-95
dd_Smed_v4_1566_0_1	prohormone convertase 2	CNS, PNS	Collins 2010	2.65499	5.1348e-88
dd_Smed_v4_5133_0_2	1020HH	CNS	Collins 2010	6.34584	3.04097e-304
dd_Smed_v4_9795_0_1	netrin 1	CNS	Cebria 2005	1.49617	3.55848e-16
dd_Smed_v4_14852_0_1	netrin 2	NP	Cebria 2005	2.51453	1.17758e-21
dd_Smed_v4_8392_0_2	tryptophan hydroxylase	CNS, PR	Currie 2013	0.331409	0.266686
dd_Smed_v4_16581_0_1	tyrosine hydroxylase	CNS, PHX	Fraguas 2011	2.91815	2.95e-49
dd_Smed_v4_2688_0_1	beta-catenin	Global	Petersen 2008	-1.66669	9.84275e-33
dd_Smed_v4_28398_0_1	wntP-1	Tail	Petersen 2008	1.15764	0.317523
dd_Smed_v4_7326_0_1	wntP-2	Tail	Petersen 2008	0.357835	0.348686
dd_Smed_v4_14865_0_1	wntP-3	PHX	Petersen 2008	-3.06494	0.0131197
dd_Smed_v4_659_0_1	smedwi-1	NB	Reddien 2005	-1.58124	1.98019e-31
dd_Smed_v4_756_0_1	smedwi-2	NB	Reddien 2005	-0.745341	1.50007e-05
dd_Smed_v4_899_0_1	agat-1	PCYM	Eisenhoffer 2008	-2.0942	2.486e-51
dd_Smed_v4_4575_0_1	cubulin	NPH	Scimone 2011	-3.48962	4.77758e-104
dd_Smed_v4_9774_0_1	sine oculis 1/2-2	NPH	Scimone 2011	0.0297442	1
dd_Smed_v4_8234_0_1	pou2/3	NPH	Scimone 2011	-1.71474	7.52166e-12
dd_Smed_v4_4841_0_1	carbonic anhydrase	NPH	Scimone 2011	-2.48492	2.12296e-34
dd_Smed_v4_34399_0_1	tyrosinase	PR	Lapan 2011	-2.42904	1.97425e-07
dd_Smed_v4_19040_0_1	distal-less	PR, PCYM	Lapan 2011	1.77151	1.5605e-10
dd_Smed_v4_17385_0_1	sp6-9	PR	Lapan 2011	1.35969	0.000137045
dd_Smed_v4_48430_0_1	ovo	PR	Lapan 2012	-2.76805	0.420349
dd_Smed_v4_769_0_1	marginal adhesive gland-1	RIM	Zayas 2010	-4.48133	4.25978e-196
dd_Smed_v4_702_0_1	collagen	MUS	Witchley 2013	-4.39706	7.36573e-197
dd_Smed_v4_3131_0_1	mboat2	GUT		0.525823	0.000874343
dd_Smed_v4_7223_0_1	mboat7	GUT		1.23725	3.35944e-15
dd_Smed_v4_907_0_1	mat	GUT	Wenemoser 2010	-2.05467	3.06647e-44
dd_Smed_v4_249_0_1	mhc6	PHX		-2.73088	3.23544e-93
