# Supplementary material for: Hedgehog signaling regulates gene expression in planarian glia
Source: eLife. 2016 Sep 9;5:e16996. doi: 10.7554/eLife.16996 (PMC5055395; doi:10.7554/eLife.16996)
Supplement: Figure 1—source data 3. — Criteria for selecting genes were (1) adjusted p-value (padj) of less than 0.05, (2) greater than 1000 RPKM, and (3) greater than 2-fold change in expression level either between control(RNAi) and hh(RNAi) or between control(RNAi) and ptc(RNAi). Annotations by best BLAST hit listed for each gene; "No Similarity" listed if no significant BLAST hit was found. Two genes, prog-1 and reticulocalbin-1, were described in planarians previously (Eisenhoffer et al., 2008; Zayas et al., 2010). Blue text indicates greater than 2-fold change in expression level. Green text indicates enrichment in CNS tissue versus whole head fragment. DOI: http://dx.doi.org/10.7554/eLife.16996.005 [file elife-16996-fig1-data3.xlsx]

## Sheet: Sheet1
Figure 1 - source data 3. Genes with significant differential expression levels following inhibition of hh or ptc.
			hh(RNAi) CNS vs. control(RNAi) CNS		ptc(RNAi) CNS vs. control(RNAi) CNS		control(RNAi) CNS vs. control(RNAi) head
Contig ID	Annotation	E Value	Log2 Fold Change	padj	Log2 Fold Change	padj	Log2 Fold Change	padj
dd_Smed_v4_7131_0_1	GLIPR1-like protein 1-like (Schmidtea mediterranea)	2e-44	-2.99648	4.58163e-21	1.46965	3.13238e-07	0.249691	0.736679
dd_Smed_v4_3451_0_1	FAM115A (Homo sapiens)	6e-38	-2.89614	4.86609e-24	1.15237	0.105399	-0.350216	0.527741
dd_Smed_v4_9961_0_1	protocadherin-19 (Mus musculus)	0.001	-2.79872	1.60606e-24	0.255787	1	3.74832	9.34199e-06
dd_Smed_v4_6605_0_1	No Similarity		-2.3972	8.59727e-12	1.63344	2.6898e-10	2.25461	0.0344402
dd_Smed_v4_433_0_1	GLIPR1-like protein 1-like (Schmidtea mediterranea)	2e-44	-2.16489	1.28985e-13	1.40054	2.1312e-05	1.22716	0.131827
dd_Smed_v4_12254_0_1	Protein IFA-1 (Caenorhabditis elegans)	1e-82	-2.09515	0.0435947	0.184144	1	4.68382	7.84444e-09
dd_Smed_v4_648_0_1	tubulin alpha 1A chain (Homo sapiens)	0	-1.18684	0.00801664	1.18846	0.0115816	-1.60961	4.8623e-12
dd_Smed_v4_69_0_2	No Similarity		-1.18546	0.00801664	-0.933225	0.174725	-1.14522	1.1179e-07
dd_Smed_v4_821_0_1	protein disulfide-isomerase A5 (Mus musculus)	2e-32	-1.17595	0.043379	1.27622	0.850021	-0.509069	0.249779
dd_Smed_v4_332_0_1	prog-1 (Schmidtea mediterranea)	0	-1.16461	0.0233711	-0.829256	1	0.463699	0.242014
dd_Smed_v4_1206_0_1	hematopoetic prostaglandin D synthase (Mus musculus)	1e-24	-1.15111	0.0435947	-0.133274	1	2.85297	7.34094e-12
dd_Smed_v4_16532_0_1	No Similarity		-1.08795	0.0147857	-2.52797	6.95562e-14	7.224	1.00858e-09
dd_Smed_v4_122_1_1	lysosomal acid lipase/cholesteryl ester hydrolase precursor	9e-104	0.50743	1	-4.26416	4.84805e-06	-0.077235	0.940901
dd_Smed_v4_13510_0_1	No Similarity		-0.380847	1	-0.906047	8.60958e-05	6.98891	3.82252e-33
dd_Smed_v4_284_0_1	Saposin-related (Drosophila melanogaster)	3e-05	0.214881	1	-0.729206	0.00984938	0.718251	0.0150882
dd_Smed_v4_493_0_1	reticulocalbin-1 (Schmidtea mediterranea)	0	-0.652509	1	0.900499	0.0329583	-1.88708	1.2449e-40
dd_Smed_v4_2627_0_1	E3 ubiquitin-protein ligase MYLIP (Homo sapiens)	2e-64	0.326502	1	0.995474	2.97047e-05	-0.313654	0.146565
dd_Smed_v4_331_0_1	No Similarity		-0.824337	1	1.26432	0.000803668	-0.448781	0.320536
dd_Smed_v4_2649_0_1	fibrillin-2 (Homo sapien)	8e-142	0.052088	1	1.29096	2.73406e-09	-1.9404	4.75088e-46
dd_Smed_v4_57_0_1	WAP four-disulfide core domain protein 6B (Mus musculus)	7e-12	-1.14958	1	1.37547	0.000388059	-0.198671	0.733208
dd_Smed_v4_750_0_1	No Similarity		-0.430802	1	1.49483	3.81133e-09	0.827887	0.145487
dd_Smed_v4_1636_0_1	zonadhesin (Homo sapiens)	4e-33	-1.83525	1	1.54536	0.00502406	-0.553519	0.434117
dd_Smed_v4_2169_0_1	No Similarity		-0.495659	1	1.55292	6.0995e-15	0.781199	0.179651
dd_Smed_v4_1530_0_1	GLIPR1-like protein 1-like (Schmidtea mediterranea)	2e-44	-1.11534	1	1.62149	0.00149517	0.835299	0.252562
dd_Smed_v4_348_0_1	peptidyl-prolyl cis-trans isomerase C (Mus musculus)	5e-46	-0.501677	1	2.00418	3.99048e-06	-0.974059	0.0162541
dd_Smed_v4_1242_0_1	peptidyl-prolyl cis-trans isomerase B (Mus musculus)	7e-46	-0.354848	1	2.29348	3.80541e-08	-0.845423	0.0781574
dd_Smed_v4_628_0_1	SCO-spondin-like (Mus musculus)	3e-25	-0.191526	1	2.5545	4.65462e-40	-3.33811	6.77483e-95
dd_Smed_v4_9223_0_1	No Similarity		-3.2401	0.850886	2.74949	0.000110196	2.20751	0.14309
dd_Smed_v4_13594_0_1	No Similarity		-3.56349	1	2.84837	2.42435e-06	2.76248	0.0937386
dd_Smed_v4_447_0_1	No Similarity		0.255092	1	2.90147	1.70509e-07	-1.01179	0.119301
