# Supplementary material for: Hedgehog signaling regulates gene expression in planarian glia
Source: eLife. 2016 Sep 9;5:e16996. doi: 10.7554/eLife.16996 (PMC5055395; doi:10.7554/eLife.16996)
Supplement: Figure 1—source data 4. — Text in gray represents hypothetical proteins or sequences with high BLASTX similarity. DOI: http://dx.doi.org/10.7554/eLife.16996.006 [file elife-16996-fig1-data4.xlsx]

## Sheet: Sheet1
Figure 1 - source data 4. Accession numbers of protein sequences used in phylogenetic analysis of intermediate filament proteins
Species	Symbol	Description	Accension ID
Homo sapiens	DES	Desmin	NP_001918.3
Homo sapiens	KER1	Keratin, Type II cytoskeletal 1	NP_006112.3
Homo sapiens	KER5	Keratin, Type II cytoskeletal 5	NP_000415.2
Homo sapiens	KER9	Keratin, Type I Cytoskeletal 9	NP_000217.2
Homo sapiens	KER14	Keratin, Type I Cytoskeletal 14	NP_000517.2
Homo sapiens	LMNAC	Prelamin-A/C	NP_733821.1
Homo sapiens	LMNB1	Lamin-B1	NP_005564.1
Homo sapiens	LMNB2	Lamin-B2	NP_116126.2
Homo sapiens	NFL	Neurofilament Light Polypeptide	NP_006149.2
Homo sapiens	Phakinin	Phakinin	NP_003562.1
Homo sapiens	VIM	Vimentin	NP_003371.2
Ciona intestinalis	GFAP1	Glial Fibrillary Acidic Protein	XP_002119137.3
Ciona intestinalis	GFAP2	Glial Fibrillary Acidic Protein	XP_002119125.1
Ciona intestinalis	GFAPL	Glial Fibrillary Acidic Protein-like	XP_002119114.1
Ciona intestinalis	GFAP4	Glial Fibrillary Acidic Protein	XP_002119113.2
Ciona intestinalis	GFAP3	Glial Fibrillary Acidic Protein	XP_002119136.1
Ciona intestinalis	LMNLL	Lamin-L(II)-like	XP_002119169.1
Caenorhabditis elegans	IFA-1	Intermediate Filament, A Family Member 1	NP_741902.1
Caenorhabditis elegans	IFA-3	Intermediate Filament, A Family Member 3	NP_510649.3
Caenorhabditis elegans	IFA-4	Intermediate Filament, A Family Member 4	NP_508836.3
Caenorhabditis elegans	IFB-1	Intermediate Filament, B Family Member 1	NP_495136.1
Caenorhabditis elegans	IFB-2	Intermediate Filament, B Family Member 2	NP_495133.1
Caenorhabditis elegans	IFC-1	Intermediate Filament, C Family Member 1	NP_503783.1
Caenorhabditis elegans	IFC-2	Intermediate Filament, C Family Member 2	NP_741705.1
Caenorhabditis elegans	IFD-1	Intermediate Filament, D Family Member 1	NP_001024830.1
Caenorhabditis elegans	IFD-2	Intermediate Filament, D Family Member 2	NP_508160.1
Caenorhabditis elegans	IFP-1	Intermediate Filament Protein, Class E Family Member	NP_509628.1
Caenorhabditis elegans	LMN-1	Nuclear Lamin Family Member	NP_492371.1
Caenorhabditis elegans	MUA-6	Muscle Attachment Abnormal Family Member 6	NP_510648.1
Drosophila melanogaster	Lamin	Lamin	NP_476616.1
Drosophila melanogaster	LaminC	Lamin C	NP_523742.2
Helobdella medicinalis	Filarin	Intermediate Filament Filarin	AAD29246.1
Helobdella medicinalis	Gliarin	Intermediate Filament Gliarin	AAD29248.1
Helobdella medicinalis	Macrolin	Intermediate Filament Macrolin	AAD29247.1
Helobdella robusta	CIF1	Hypothetical Protein HELRODRAFT_154543	XP_009012993.1
Helobdella robusta	CIF2	Hypothetical Protein HELRODRAFT_112412
Helobdella robusta	CIF3	Hypothetical Protein HELRODRAFT_186040	XP_009027843.1
Helobdella robusta	CIF4	Hypothetical Protein HELRODRAFT_90252	XP_009030018.1
Helobdella robusta	CIF5	Hypothetical Protein HELRODRAFT_173304	XP_009018169.1
Helobdella robusta	CIF6	Hypothetical Protein HELRODRAFT_92478	XP_009017077.1
Helobdella robusta	CIF7	Hypothetical Protein HELRODRAFT_72466	XP_009011237.1
Helobdella robusta	CIF8	Hypothetical Protein HELRODRAFT_185776
Helobdella robusta	CIF9	Hypothetical Protein HELRODRAFT_185279	XP_009011060.1
Helobdella robusta	LMN1	Hypothetical Protein HELRODRAFT_94863	XP_009022589.1
Helobdella robusta	LMN2	Hypothetical Protein HELRODRAFT_113696	XP_009022369.1
Capitella teleta	182411	Hypothetical Protein CAPTEDRAFT_182411	ELU01357.1
Capitella teleta	220856	Hypothetical Protein CAPTEDRAFT_220856	ELU09783.1
Lottia gigantea	23084	Hypothetical Protein LOTGIDRAFT_23084
Lottia gigantea	109284	Hypothetical Protein LOTGIDRAFT_109284	XP_009044339.1
Lottia gigantea	179001	Hypothetical Protein LOTGIDRAFT_179001	XP_009059675.1
Lottia gigantea	186411	Hypothetical Protein LOTGIDRAFT_186411	XP_009048851.1
Lottia gigantea	204366	Hypothetical Protein LOTGIDRAFT_204366	XP_009060607.1
Lottia gigantea	204921	Hypothetical Protein LOTGIDRAFT_204921	XP_009067149.1
Nematostella vectensis	1	Predicted Protein	XP_001629288.1
