# Supplementary material for: Hedgehog signaling regulates gene expression in planarian glia
Source: eLife. 2016 Sep 9;5:e16996. doi: 10.7554/eLife.16996 (PMC5055395; doi:10.7554/eLife.16996)
Supplement: Figure 2—source data 1. — DOI: http://dx.doi.org/10.7554/eLife.16996.011 [file elife-16996-fig2-data1.xlsx]

## Sheet: Sheet1
Figure 2 - source data 1. Cell counts for if-1 and cali co-expression
if-1 / cali and ptc Co-expression Raw Cell Counts
	Inside Neuropil				Outside Neuropil
Animal	if-1 / cali only	if-1 / cali / ptc	Total	Percent	if-1 / cali only	if-1 / cali / ptc	Total	Percent
01	8	145	153	94.7712	0	18	18	100
02	0	82	82	100	0	13	13	100
03	1	120	121	99.1736	0	11	11	100
04	2	126	128	98.4375	0	7	7	100
05	1	94	95	98.9474	0	5	5	100
06	7	131	138	94.9275	0	16	16	100
07	2	148	150	98.6667	0	6	6	100
Average				97.8463				100
Standard Dev.				2.10595				0
Raw Cell Counts
		Inside Neuropil					Outside Neuropil
Condition	Animal	Area	if-1 only	cali only	if-1 / cali	Total	Area	if-1 only	cali only	if-1 / cali	Total
control RNAi	01	0.0776914	10	8	129	147	0.198949	4	0	4	8
	02	0.0745979	6	9	172	187	0.195983	0	6	5	11
	03	0.0973708	10	7	195	212	0.252516	0	14	6	20
	04	0.0853674	10	7	174	191	0.207565	2	9	3	14
	05	0.0879509	23	5	136	164	0.227381	1	11	6	18
hh RNAi	01	0.0993727	5	0	1	6	0.250852	0	0	0	0
	02	0.0680424	7	1	0	8	0.169659	1	0	0	1
	03	0.0611269	5	0	5	10	0.13992	0	0	0	0
	04	0.0745108	19	2	4	25	0.190144	0	0	0	0
ptc RNAi	01	0.0604129	12	6	161	179	0.155402	7	21	33	61
	02	0.062029	10	13	194	217	0.21443	6	42	51	99
	03	0.0740898	8	20	240	268	0.19971	8	42	65	115
	04	0.0688241	20	12	202	234	0.196445	12	32	48	92
	05	0.0944884	13	37	261	311	0.291513	8	54	63	125
Cell Density (cells per square millimeter)
		Inside Neuropil				Outside Neuropil
Condition	Animal	if-1 only	cali only	if-1 / cali	Total	if-1 only	cali only	if-1 / cali	Total
control RNAi	01	128.714	102.972	1660.42	1892.1	20.1057	0	20.1057	40.2114
	02	80.4312	120.647	2305.69	2506.77	0	30.6149	25.5124	56.1273
	03	102.7	71.8901	2002.65	2177.24	0	55.4419	23.7608	79.2028
	04	117.141	81.9985	2038.25	2237.39	9.63553	43.3599	14.4533	67.4487
	05	261.51	56.8499	1546.32	1864.68	4.39791	48.377	26.3874	79.1623
	Average	138.099	86.8714	1910.67	2135.64	6.82783	35.5587	22.0439	64.4305
hh RNAi	01	50.3156	0	10.0631	60.3788	0	0	0	0
	02	102.877	14.6967	0	117.574	5.89419	0	0	5.89419
	03	81.797	0	81.797	163.594	0	0	0	0
	04	254.997	26.8418	53.6835	335.522	0	0	0	0
	Average	122.497	10.3846	36.3859	169.267	1.47355	0	0	1.47355
ptc RNAi	01	198.633	99.3166	2664.99	2962.94	45.0444	135.133	212.352	392.529
	02	161.215	209.579	3127.57	3498.36	27.9812	195.868	237.84	461.69
	03	107.977	269.943	3239.31	3617.23	40.0582	210.305	325.473	575.836
	04	290.596	174.358	2935.02	3399.97	61.0857	162.895	244.343	468.324
	05	137.583	391.582	2762.24	3291.41	27.443	185.24	216.114	428.797
	Average	179.201	228.956	2945.83	3353.98	40.3225	177.888	247.224	465.435
Overall Density
		Inside Neuropil			Outside Neuropil
Condition	n	Average	Std. Dev.	t test	Total	Std. Dev.	t test
control RNAi	5	2135.64	265.779		64.4305	16.5821
hh RNAi	4	169.267	118.605	2.72161e-06	1.47355	2.9471	0.000149421
ptc RNAi	5	3353.98	249.543	7.10948e-05	465.435	68.6811	1.39778e-06
