# Supplementary material for: Hedgehog signaling regulates gene expression in planarian glia
Source: eLife. 2016 Sep 9;5:e16996. doi: 10.7554/eLife.16996 (PMC5055395; doi:10.7554/eLife.16996)
Supplement: Figure 3—source data 1. — DOI: http://dx.doi.org/10.7554/eLife.16996.015 [file elife-16996-fig3-data1.xlsx]

## Sheet: Sheet1
Figure 3 - source data 1. Cell counts for glia marker co-expression
glut and gs Co-expression Raw Cell Counts
	Inside Neuropil				Outside Neuropil
Animal	glut only	glut / gs	Total	Percent	glut only	glut / gs	Total	Percent
01	0	108	108	100	0	66	66	100
02	4	98	102	96.0784	2	119	121	98.3471
03	1	88	89	98.8764	0	77	77	100
04	2	126	128	98.4375	0	124	124	100
05	2	134	136	98.5294	0	100	100	100
06	0	117	117	100	0	77	77	100
Average				98.6536				99.7245
Standard Dev.				1.44006				0.674791
trpm and gs Co-expression Raw Cell Counts
	Inside Neuropil				Outside Neuropil
Animal	trpm only	trpm / gs	Total	Percent	trpm only	trpm / gs	Total	Percent
01	1	90	91	98.9011	4	42	46	91.3043
02	0	92	92	100	2	67	69	97.1014
03	7	87	94	92.5532	4	69	73	94.5205
04	0	101	101	100	2	72	74	97.2973
05	0	93	93	100	3	86	89	96.6292
06	11	94	105	89.5238	11	66	77	85.7143
Average				96.8297				93.7612
Standard Dev.				4.60668				4.54428
glut and ptc Co-expression Raw Cell Counts
	Inside Neuropil				Outside Neuropil
Animal	glut only	glut / ptc	Total	Percent	glut only	glut / ptc	Total	Percent
01	0	104	104	100	7	58	65	89.2308
02	1	115	116	99.1379	19	89	108	82.4074
03	1	98	99	98.9899	7	55	62	88.7097
04	0	151	151	100	5	60	65	92.3077
05	1	131	132	99.2424	4	66	70	94.2857
06	0	111	111	100	2	49	51	96.0784
07	2	101	103	98.0583	5	45	50	90
Average				99.3469				90.4314
Standard Dev.				0.721372				4.45798
