# Supplementary material for: Hedgehog signaling regulates gene expression in planarian glia
Source: eLife. 2016 Sep 9;5:e16996. doi: 10.7554/eLife.16996 (PMC5055395; doi:10.7554/eLife.16996)
Supplement: Figure 3—source data 2. — Text in gray represents hypothetical proteins or sequences with high BLASTX similarity. DOI: http://dx.doi.org/10.7554/eLife.16996.016 [file elife-16996-fig3-data2.xlsx]

## Sheet: Sheet1
Figure 3 - source data 2. Accession numbers of protein sequences used in phylogenetic analysis of excitatory amino acid transporters
Species	Symbol	Description	Accension ID
Homo sapiens	EAAT1	Excitatory Amino Acid Transporter 1	NP_004163.3
Homo sapiens	EAAT2	Excitatory Amino Acid Transporter 2	NP_004162.2
Homo sapiens	EAAT3	Excitatory Amino Acid Transporter 3	NP_004161.4
Homo sapiens	EAAT4	Excitatory Amino Acid Transporter 4	NP_005062.1
Homo sapiens	EAAT5	Excitatory Amino Acid Transporter 5	NP_001274524.1
Homo sapiens	SLC1A4	Neutral Amino Acid Transporter A	NP_003029.2
Homo sapiens	SLC1A5	Neutral Amino Acid Transporter B	NP_005619.1
Danio rerio	EAAT1	Excitatory Amino Acid Transporter 1	NP_997805.1
Danio rerio	EAAT2	Excitatory Amino Acid Transporter 2	NP_956273.1
Danio rerio	EAAT3	Excitatory Amino Acid Transporter 3	NP_001002666.2
Danio rerio	EAAT4	Excitatory Amino Acid Transporter 4	NP_001103173.1
Danio rerio	EAAT5	Excitatory Amino Acid Transporter 5	NP_001278273.1
Ciona intestinalis	EAAT3	Excitatory Amino Acid Transporter 3	XP_002124271.1
Ciona intestinalis	EAATL	Excitatory Amino Acid Transporter-like	XP_002130715.1
Caenorhabditis elegans	GLT-1	Protein GLT-1	NP_001024393.1
Caenorhabditis elegans	GLT-3	Protein GLT-3	NP_501844.1
Caenorhabditis elegans	GLT-4	Protein GLT-4	NP_509075.3
Caenorhabditis elegans	GLT-5	Protein GLT-5	NP_496094.1
Caenorhabditis elegans	GLT-6	Protein GLT-6	NP_501210.3
Drosophila melanogaster	EAAT1	Excitatory Amino Acid Transporter 1	NP_477428.1
Drosophila melanogaster	EAAT2	Excitatory Amino Acid Transporter 2	NP_477427.1
Capitella teleta	6024	Hypothetical Protein CAPTEDRAFT_6024	ELU03325.1
Capitella teleta	224146	Hypothetical Protein CAPTEDRAFT_224146	ELT91366.1
Lottia gigantea	126571	Hypothetical Protein LOTGIDRAFT_126471	XP_009061216.1
Lottia gigantea	169299	Hypothetical Protein LOTGIDRAFT_169299	XP_009065865.1
Crassostrea gigas	EAAT1	Excitatory Amino Acid Transporter 1	EKC42273.1
Crassostrea gigas	EAAT2	Excitatory Amino Acid Transporter 2	EKC23472.1
Crassostrea gigas	EAAT3	Excitatory Amino Acid Transporter 3	EKC18347.1
Nematostella vectensis	1	Predicted Protein	XP_001631520.1
Nematostella vectensis	2	Predicted Protein	XP_001625720.1
