# Supplementary material for: Hedgehog signaling regulates gene expression in planarian glia
Source: eLife. 2016 Sep 9;5:e16996. doi: 10.7554/eLife.16996 (PMC5055395; doi:10.7554/eLife.16996)
Supplement: Figure 3—source data 3. — Text in gray represents hypothetical proteins or sequences with high BLASTX similarity. DOI: http://dx.doi.org/10.7554/eLife.16996.017 [file elife-16996-fig3-data3.xlsx]

## Sheet: Sheet1
Figure 3 - source data 3. Accession numbers of protein sequences used in phylogenetic analysis of GABA transporters
Species	Symbol	Description	Accension ID
Homo sapiens	DAT1	Sodium-dependent Dopamine Transporter	NP_001035.1
Homo sapiens	GAT1	Sodium- and Chloride-dependent GABA Transporter 1	NP_003033.3
Homo sapiens	GAT2	Sodium- and Chloride-dependent GABA Transporter 2	NP_057699.2
Homo sapiens	GAT3	Sodium- and Chloride-dependent GABA Transporter 3	NP_055044.1
Homo sapiens	CT1	Sodium- and Chloride-dependent Creatine Transporter 1	NP_005620.1
Homo sapiens	TAUT	Sodium- and Chloride-dependent Taurine Transporter	NP_003034.2
Danio rerio	GAT1	Sodium- and Chloride-dependent GABA Transporter 1	NP_001007363.1
Danio rerio	GAT2	Sodium- and Chloride-dependent GABA Transporter 2	XP_002667408.3
Danio rerio	GAT3	Sodium- and Chloride-dependent GABA Transporter 3	XP_001919920.5
Danio rerio	CT1	Sodium- and Chloride-dependent Creatine Transporter 1	XP_695932.1
Danio rerio	TAUT	Sodium- and Chloride-dependent Taurine Transporter	NP_001032750.1
Ciona intestinalis	GAT1	Sodium- and Chloride-dependent GABA Transporter 1	XP_009859590.1
Ciona intestinalis	GAT2	Sodium- and Chloride-dependent GABA Transporter 2	XP_009858630.1
Ciona intestinalis	GAT3	Sodium- and Chloride-dependent GABA Transporter 3	XP_002126541.1
Ciona intestinalis	CT1	Sodium- and Chloride-dependent Creatine Transporter 1	XP_009861446.1
Ciona intestinalis	TAUT	Sodium- and Chloride-dependent Taurine Transporter	XP_002128645.1
Caenorhabditis elegans	SNF-11	SNF-11	NP_505873.2
Drosophila melanogaster	CG1732	CG1732	NP_651930.2
Crassostrea gigas	GAT2	Sodium- and Chloride-dependent GABA Transporter 2	EKC37109.1
Crassostrea gigas	TAUT	Sodium- and Chloride-dependent Taurine Transporter	NP_001292278.1
Capitella teleta	146418	Hypothetical Protein CAPTEDRAFT_146418	ELT89928.1
Lottia gigantea	111250	Hypothetical Protein LOTGIDRAFT_111250	XP_009047116.1
Nematostella vectensis	1	Predicted Protein	XP_001624456.1
Nematostella vectensis	2	Predicted Protein	XP_001623645.1
