# Supplementary material for: Hedgehog signaling regulates gene expression in planarian glia
Source: eLife. 2016 Sep 9;5:e16996. doi: 10.7554/eLife.16996 (PMC5055395; doi:10.7554/eLife.16996)
Supplement: Figure 3—source data 4. — Text in gray represents hypothetical proteins or sequences with high BLASTX similarity. DOI: http://dx.doi.org/10.7554/eLife.16996.018 [file elife-16996-fig3-data4.xlsx]

## Sheet: Sheet1
Figure 3 - source data 4. Accession numbers of protein sequences used in phylogenetic analysis of glucose transporters
Species	Symbol	Description	Accension ID
Homo sapiens	GLUT1	Facilitated Glucose Transporter Member 1	NP_006507.2
Homo sapiens	GLUT2	Facilitated Glucose Transporter Member 2	NP_000331.1
Homo sapiens	GLUT3	Facilitated Glucose Transporter Member 3	NP_008862.1
Homo sapiens	GLUT4	Facilitated Glucose Transporter Member 4	NP_001033.1
Homo sapiens	GLUT5	Facilitated Glucose Transporter Member 5	NP_003030.1
Danio rerio	GLUT1	Facilitated Glucose Transporter Member 1	NP_001034897.1
Danio rerio	GLUT2	Facilitated Glucose Transporter Member 2	NP_001036186.1
Danio rerio	GLUT3	Facilitated Glucose Transporter Member 3	NP_001002643.1
Ciona intestinalis	GLUT1	Facilitated Glucose Transporter Member 1	XP_009862019.1
Ciona intestinalis	GLUT5	Facilitated Glucose Transporter Member 5	XP_009858999.1
Caenorhabditis elegans	FGT-1	FGT-1	CCD72383.1
Drosophila melanogaster	GLUT1	Glucose Transporter 1	AAC36683.2
Drosophila melanogaster	GLUT3	Glucose Transporter 3	NP_536732.1
Crassostrea gigas	GLUT11	Facilitated Glucose Transporter Member 1	EKC40197.1
Crassostrea gigas	GLUT12	Facilitated Glucose Transporter Member 3	EKC24217.1
Capitella teleta	170630	Hypothetical Protein CAPTEDRAFT_170630	ELT98295.1
Capitella teleta	219782	Hypothetical Protein CAPTEDRAFT_219782	ELT96391.1
Lottia gigantea	180320	Hypothetical Protein LOTGIDRAFT_180320	XP_009048161.1
Lottia gigantea	228693	Hypothetical Protein LOTGIDRAFT_228693	XP_009057821.1
Nematostella vectensis	1	Predicted Protein	XP_001627220.1
