# Supplementary material for: Hedgehog signaling regulates gene expression in planarian glia
Source: eLife. 2016 Sep 9;5:e16996. doi: 10.7554/eLife.16996 (PMC5055395; doi:10.7554/eLife.16996)
Supplement: Figure 3—source data 5. — Text in gray represents hypothetical proteins or sequences with high BLASTX similarity. DOI: http://dx.doi.org/10.7554/eLife.16996.019 [file elife-16996-fig3-data5.xlsx]

## Sheet: Sheet1
Figure 3 - source data 5. Accession numbers of protein sequences used in phylogenetic analysis of transient receptor potential channels
Species	Symbol	Description	Accension ID
Homo sapiens	MCOLN1	Mucolipin-1	NP_065394.1
Homo sapiens	MCOLN2	Mucolipin-2	NP_694991.2
Homo sapiens	MCOLN3	Mucolipin-3	NP_060768.8
Homo sapiens	TRPA1	Transient Receptor Potential Cation Channel A Member 1	NP_015628.2
Homo sapiens	TRPC1	Transient Receptor Potential Cation Channel C Member 1	EAW78963.1
Homo sapiens	TRPM1	Transient Receptor Potential Cation Channel M Member 1	NP_001238949.1
Homo sapiens	TRPM2	Transient Receptor Potential Cation Channel M Member 2	NP_003298.1
Homo sapiens	TRPM3	Transient Receptor Potential Cation Channel M Member 3	NP_066003.3
Homo sapiens	TRPM4	Transient Receptor Potential Cation Channel M Member 4	NP_060106.2
Homo sapiens	TRPM5	Transient Receptor Potential Cation Channel M Member 5	NP_055370.1
Homo sapiens	TRPM6	Transient Receptor Potential Cation Channel M Member 6	NP_060132.3
Homo sapiens	TRPM7	Transient Receptor Potential Cation Channel M Member 7	NP_060142.3
Homo sapiens	TRPM8	Transient Receptor Potential Cation Channel M Member 8	NP_076985.4
Homo sapiens	TRPV1	Transient Receptor Potential Cation Channel V Member 1	NP_542437.2
Danio rerio	STRP1	Short Transient Receptor Potential Channel 1	NP_001185590.1
Danio rerio	TRPA1	Transient Receptor Potential Cation Channel A Member 1	NP_001007066.1
Danio rerio	TRPM2	Transient Receptor Potential Cation Channel M Member 2	NP_001275746.1
Danio rerio	TRPM4A	Transient Receptor Potential Cation Channel M Member 4A	NP_001275744.1
Danio rerio	TRPM4B	Transient Receptor Potential Cation Channel M Member 4B	NP_001269082.1
Danio rerio	TRPM5	Transient Receptor Potential Cation Channel M Member 5	NP_001121711.1
Danio rerio	TRPM6	Transient Receptor Potential Cation Channel M Member 6	NP_001238760.1
Danio rerio	TRPM7	Transient Receptor Potential Cation Channel M Member 7	NP_001025232.1
Danio rerio	TRPN1	Transient Receptor Potential Cation Channel N Member 1	NP_899192.1
Danio rerio	TRPV1	Transient Receptor Potential Cation Channel V Member 1	NP_001119871.1
Ciona intestinalis	TRPM1	Transient Receptor Potential Cation Channel M Member 1	XP_002121072.2
Caenorhabditis elegans	GON-2	Protein GON-2	NP_492315.4
Caenorhabditis elegans	GTL-1	Protein GTL-1	NP_502111.3
Caenorhabditis elegans	GTL-2	Protein GTL-2	NP_502118.4
Caenorhabditis elegans	TRP-1	TRP-1	NP_001040889.1
Caenorhabditis elegans	TRP-2	TRP-2	NP_497311.2
Caenorhabditis elegans	TRPA1	TRPA-1	NP_502249.3
Drosophila melanogaster	NOMPC	No Mechanoreceptor Potential C	AAF52248.3
Drosophila melanogaster	TRPA1	Transient Receptor Potential Cation Channel A Member 1	NP_648263.5
Drosophila melanogaster	TRPC	Transient Receptor Potential Cation Channel Gamma	NP_609802.1
Drosophila melanogaster	TRPM	Transient Receptor Potential Cation Channel M	ACL83126.2
Capitella teleta	199955	Hypothetical Protein CAPTEDRAFT_199955	ELT97299.1
Capitella teleta	226576	Hypothetical Protein CAPTEDRAFT_226576	ELT87598.1
Lottia gigantea	161660	Hypothetical Protein LOTGIDRAFT_161660	XP_009055754.1
Lottia gigantea	229069	Hypothetical Protein LOTGIDRAFT_229069	XP_009060203.1
Nematostella vectensis	TRPM2	Hypothetical Protein NEMVEDRAFT_v1g248535	XP_001622235.1
