# Supplementary material for: Hedgehog signaling regulates gene expression in planarian glia
Source: eLife. 2016 Sep 9;5:e16996. doi: 10.7554/eLife.16996 (PMC5055395; doi:10.7554/eLife.16996)
Supplement: Figure 4—source data 1. — DOI: http://dx.doi.org/10.7554/eLife.16996.027 [file elife-16996-fig4-data1.xlsx]

## Sheet: Sheet1
Figure 4 - source data 1. Orthogonal branch coverage counts following Hh pathway perturbation
Branch Counts
Condition	Animal	Covered	Uncovered	Total	% Coverage	t test
control RNAi	01	17	69	86	19.7674
	02	9	73	82	10.9756
	03	14	80	94	14.8936
	04	16	61	77	20.7792
	05	8	78	86	9.30233
	Average				15.1436
	Std. Dev.				5.11603
hh RNAi	01	0	72	72	0
	02	5	95	100	5
	03	0	93	93	0
	04	4	72	76	5.26316
	05	0	77	77	0
	Average				2.05263	0.00103446
	Std. Dev.				2.81222
ptc RNAi	01	60	34	94	63.8298
	02	47	45	92	51.087
	03	50	32	82	60.9756
	04	53	23	76	69.7368
	Average				61.4073	1.30336e-05
	Std. Dev.				7.78772
