# Supplementary material for: Hedgehog signaling regulates gene expression in planarian glia
Source: eLife. 2016 Sep 9;5:e16996. doi: 10.7554/eLife.16996 (PMC5055395; doi:10.7554/eLife.16996)
Supplement: Figure 5—source data 1. — DOI: http://dx.doi.org/10.7554/eLife.16996.039 [file elife-16996-fig5-data1.xlsx]

## Sheet: Sheet1
Figure 5 - source data 1. Cell counts for co-expression of if-1/cali and gat following Hh pathway perturbation
Raw Cell Counts
		Inside Neuropil						Outside Neuropil
Condition	Animal	Area	gat only	if-1 / cali only	if-1 / cali / gat	Total gat	Total	Area	gat only	if-1 / cali only	if-1 / cali / gat	Total gat	Total
control RNAi	01	0.053771	5	8	115	120	128	0.108618	11	0	2	13	13
	02	0.0710304	6	1	103	109	110	0.155301	18	1	2	20	21
	03	0.0568719	13	5	91	104	109	0.125293	14	0	1	15	15
	04	0.0643861	9	5	81	90	95	0.122862	18	0	2	20	20
	05	0.0583786	5	7	90	95	102	0.12495	15	0	0	15	15
	06	0.0439481	9	1	61	70	71	0.0815943	13	0	2	15	15
hh RNAi	01	0.0597696	94	0	2	96	96	0.125011	16	0	0	16	16
	02	0.0630737	80	0	5	85	85	0.135818	20	1	2	22	23
	03	0.0886798	139	1	17	156	157	0.188127	28	0	0	28	28
	04	0.0612864	75	0	5	80	80	0.141251	18	0	0	18	18
	05	0.050957	73	0	7	80	80	0.109301	11	0	1	12	12
ptc RNAi	01	0.0912456	3	15	182	185	200	0.247075	21	24	33	54	78
	02	0.0826597	10	2	155	165	167	0.230958	27	9	29	56	65
	03	0.0703933	4	16	112	116	132	0.171104	9	18	14	23	41
	04	0.0881729	3	11	159	162	173	0.210773	11	6	26	37	43
	05	0.0764825	2	5	149	151	156	0.17579	9	9	23	32	41
	06	0.0664728	2	10	88	90	100	0.150721	4	4	10	14	18
Cell Density (cells per square millimeter)
		Inside Neuropil					Outside Neuropil
Condition	Animal	gat only	if-1 / cali only	if-1 / cali / gat	Total gat	Total	gat only	if-1 / cali only	if-1 / cali / gat	Total gat	Total
control RNAi	01	92.9869	148.779	2138.7	2231.69	2380.47	101.272	0	18.4132	119.686	119.686
	02	84.4709	14.0785	1450.08	1534.56	1548.63	115.904	6.43912	12.8782	128.782	135.222
	03	228.584	87.9169	1600.09	1828.67	1916.59	111.738	0	7.98129	119.719	119.719
	04	139.782	77.6565	1258.03	1397.82	1475.47	146.506	0	16.2785	162.785	162.785
	05	85.6479	119.907	1541.66	1627.31	1747.22	120.048	0	0	120.048	120.048
	06	204.787	22.7541	1388	1592.79	1615.54	159.325	0	24.5115	183.836	183.836
hh RNAi	01	1572.71	0	33.4619	1606.17	1606.17	127.989	0	0	127.989	127.989
	02	1268.36	0	79.2723	1347.63	1347.63	147.256	7.3628	14.7256	161.982	169.344
	03	1567.44	11.2765	191.701	1759.14	1770.41	148.836	0	0	148.836	148.836
	04	1223.76	0	81.5842	1305.35	1305.35	127.433	0	0	127.433	127.433
	05	1432.58	0	137.371	1569.95	1569.95	100.639	0	9.14904	109.788	109.788
ptc RNAi	01	32.8783	164.391	1994.62	2027.49	2191.89	84.9945	97.1366	133.563	218.557	315.694
	02	120.978	24.1956	1875.16	1996.14	2020.33	116.904	38.9682	125.564	242.469	281.437
	03	56.8236	227.294	1591.06	1647.88	1875.18	52.5996	105.199	81.8217	134.421	239.621
	04	34.0241	124.755	1803.28	1837.3	1962.05	52.1888	28.4666	123.355	175.544	204.011
	05	26.1498	65.3744	1948.16	1974.31	2039.68	51.1975	51.1975	130.838	182.035	233.233
	06	30.0875	150.437	1323.85	1353.94	1504.37	26.5391	26.5391	66.3476	92.8867	119.426
Overall Density
		Inside Neuropil						Outside Neuropil
		Total gat			Total if-1 / cali / gat			Total gat			Total if-1 / cali / gat
Condition	n	Average	Std. Dev.	t test	Average	Std. Dev.	t test	Average	Std. Dev.	t test	Average	Std. Dev.	t test
control RNAi	6	1702.14	294.851		1562.76	306.476		139.143	27.511		13.3438	8.55639
hh RNAi	5	1517.65	188.989	0.25977	104.678	61.0171	2.62565e-06	135.206	20.3793	0.797481	4.77493	6.82914	0.104407
ptc RNAi	6	1806.18	262.252	0.532939	1756.02	254.658	0.262283	174.319	54.5628	0.188856	110.248	28.6678	1.26595e-05
