# Supplementary material for: Hedgehog signaling regulates gene expression in planarian glia
Source: eLife. 2016 Sep 9;5:e16996. doi: 10.7554/eLife.16996 (PMC5055395; doi:10.7554/eLife.16996)
Supplement: Figure 6—source data 1. — DOI: http://dx.doi.org/10.7554/eLife.16996.043 [file elife-16996-fig6-data1.xlsx]

## Sheet: Sheet1
Figure 6 - source data 1. Cell counts for co-expression of if-1/cali and glut following lethal irradiation and Hh pathway perturbation
Raw Cell Counts
		Inside Neuropil							Outside Neuropil
Condition	Animal	Area	glut only	if-1 / cali only	if-1 / cali / glut	Total glut	Total if-1 / cali	Total	Area	glut only	if-1 / cali only	if-1 / cali / glut	Total glut	Total if-1 / cali	Total
control RNAi	01	0.102659	20	1	178	198	179	199	0.22354	177	0	7	184	7	184
	02	0.13498	21	1	192	213	193	214	0.33951	190	1	8	198	9	199
	03	0.0993727	5	4	181	186	185	190	0.234893	132	0	16	148	16	148
	04	0.1065	11	7	163	174	170	181	0.280126	199	3	20	219	23	222
	05	0.114824	16	1	175	191	176	192	0.308777	190	6	11	201	17	207
	06	0.088031	20	0	172	192	172	192	0.202992	175	1	8	183	9	184
	07	0.0760565	5	0	170	175	170	175	0.172904	133	2	21	154	23	156
	08	0.115503	25	2	170	195	172	197	0.295639	199	5	15	214	20	219
hh RNAi	01	0.116949	122	1	87	209	88	210	0.273851	193	0	4	197	4	197
	02	0.153213	80	0	122	202	122	202	0.366991	206	0	6	212	6	212
	03	0.0834305	101	0	52	153	52	153	0.173836	93	0	4	97	4	97
	04	0.121034	81	0	67	148	67	148	0.256627	152	0	0	152	0	152
	05	0.109541	97	0	113	210	113	210	0.278094	204	0	8	212	8	212
	06	0.119827	104	0	88	192	88	192	0.290971	206	0	2	208	2	208
	07	0.0930818	126	0	60	186	60	186	0.206436	125	0	4	129	4	129
	08	0.0740406	94	0	69	163	69	163	0.178505	117	0	2	119	2	119
ptc RNAi	01	0.101888	3	1	194	197	195	198	0.241469	147	24	58	205	82	229
	02	0.118979	9	5	241	250	246	255	0.326339	209	22	104	313	126	335
	03	0.0953486	1	3	183	184	186	187	0.221584	105	9	42	147	51	156
	04	0.162508	7	3	255	262	258	265	0.361115	189	39	56	245	95	284
	05	0.105059	8	3	230	238	233	241	0.251043	141	20	48	189	68	209
	06	0.109208	14	9	209	223	218	232	0.247999	169	17	59	228	76	245
	07	0.121269	15	9	212	227	221	236	0.30153	143	32	55	198	87	230
	08	0.160087	4	1	254	258	255	259	0.345752	171	24	66	237	90	261
	09	0.119635	21	3	218	239	221	242	0.30304	231	9	80	311	89	320
Cell Density (cells per square millimeter)
		Inside Neuropil						Outside Neuropil
Condition	Animal	glut only	if-1 / cali only	if-1 / cali / glut	Total glut	Total if-1 / cali	Total	glut only	if-1 / cali only	if-1 / cali / glut	Total glut	Total if-1 / cali	Total
control RNAi	01	194.819	9.74096	1733.89	1928.71	1743.63	1938.45	791.806	0	31.3143	823.12	31.3143	823.12
	02	155.578	7.40849	1422.43	1578.01	1429.84	1585.42	559.63	2.94542	23.5634	583.193	26.5088	586.139
	03	50.3156	40.2525	1821.43	1871.74	1861.68	1911.99	561.959	0	68.1162	630.075	68.1162	630.075
	04	103.287	65.7279	1530.52	1633.81	1596.25	1699.54	710.394	10.7095	71.3964	781.79	82.1058	792.5
	05	139.344	8.70898	1524.07	1663.41	1532.78	1672.12	615.33	19.4315	35.6244	650.954	55.0558	670.386
	06	227.193	0	1953.86	2181.05	1953.86	2181.05	862.102	4.9263	39.4104	901.512	44.3367	906.439
	07	65.7406	0	2235.18	2300.92	2235.18	2300.92	769.213	11.5671	121.455	890.668	133.022	902.235
	08	216.445	17.3156	1471.82	1688.27	1489.14	1705.58	673.119	16.9125	50.7376	723.857	67.6502	740.769
hh RNAi	01	1043.19	8.5507	743.911	1787.1	752.462	1795.65	704.763	0	14.6065	719.369	14.6065	719.369
	02	522.148	0	796.276	1318.42	796.276	1318.42	561.322	0	16.3492	577.671	16.3492	577.671
	03	1210.59	0	623.274	1833.86	623.274	1833.86	534.986	0	23.0102	557.997	23.0102	557.997
	04	669.235	0	553.565	1222.8	553.565	1222.8	592.299	0	0	592.299	0	592.299
	05	885.515	0	1031.58	1917.1	1031.58	1917.1	733.564	0	28.7672	762.331	28.7672	762.331
	06	867.92	0	734.393	1602.31	734.393	1602.31	707.975	0	6.87354	714.848	6.87354	714.848
	07	1353.65	0	644.594	1998.24	644.594	1998.24	605.516	0	19.3765	624.892	19.3765	624.892
	08	1269.57	0	931.921	2201.5	931.921	2201.5	655.443	0	11.2042	666.648	11.2042	666.648
ptc RNAi	01	29.4441	9.81469	1904.05	1933.49	1913.86	1943.31	608.774	99.3916	240.196	848.97	339.588	948.362
	02	75.6433	42.0241	2025.56	2101.2	2067.58	2143.23	640.439	67.4146	318.687	959.126	386.102	1026.54
	03	10.4878	31.4635	1919.27	1929.76	1950.74	1961.22	473.86	40.6166	189.544	663.404	230.161	704.021
	04	43.0749	18.4607	1569.16	1612.23	1587.62	1630.69	523.379	107.999	155.075	678.455	263.074	786.454
	05	76.1474	28.5553	2189.24	2265.39	2217.79	2293.94	561.656	79.6675	191.202	752.858	270.87	832.526
	06	128.196	82.4118	1913.78	2041.98	1996.2	2124.39	681.455	68.5487	237.904	919.36	306.453	987.908
	07	123.692	74.2152	1748.18	1871.87	1822.4	1946.09	474.247	106.125	182.403	656.65	288.528	762.775
	08	24.9865	6.24662	1586.64	1611.63	1592.89	1617.88	494.574	69.414	190.888	685.463	260.302	754.877
	09	175.534	25.0763	1822.21	1997.75	1847.29	2022.82	762.276	29.6991	263.992	1026.27	293.691	1055.97
if-1 / cali Overall Density
		if-1 / cali Inside Neuropil			if-1 / cali Outside Neuropil
Condition	n	Average	Std. Dev.	t test	Average	Std. Dev.	t test
control RNAi	8	1730.29	274.575		63.5137	33.9344
hh RNAi	8	758.508	160.335	5.49423e-07	15.0234	9.10472	0.00159045
ptc RNAi	9	1888.48	206.339	0.196075	293.197	46.6941	8.05637e-09
glut and if-1 / cali Co-expression
		Inside Neuropil						Outside Neuropil
		Total glut			Total if-1 / cali / glut			Total glut			Total if-1 / cali / glut
Condition	n	Average	Std. Dev.	t test	Average	Std. Dev.	t test	Average	Std. Dev.	t test	Average	Std. Dev.	t test
control RNAi	8	1855.74	267.533		1711.65	281.438		748.146	120.578		55.2022	31.719
hh RNAi	8	1735.17	335.102	0.439699	757.439	160.41	8.51012e-07	652.007	75.1536	0.0763067	15.0234	9.10472	0.00395361
ptc RNAi	9	1929.48	213.497	0.245776	1853.12	199.052	0.245776	798.95	142.511	0.443121	218.877	50.7748	1.09811e-06
